# Supplementary material for: A heterogeneous Rh/CPOL-BINAPa&PPh3 catalyst for hydroformylation of olefins: chemical and DFT insights into active species and the roles of BINAPa and PPh3
Source: Royal Society of Chemistry journal article supplement (doi:10.1039/d2cy00370h), 2022-01-01
Supplement: d2cy00370h1.pdf [file d2cy00370h1.pdf]

# Heterogeneous Rh/CPOL-BINAPa&PPh<sub>3</sub> Catalyst for Hydroformylation of Olefins: Chemical and DFT Insights into Active Species and the Roles of BINAPa and PPh<sub>3</sub>

Jinrong Zhang,<sup>a,†</sup> Jin Li,<sup>a,†</sup> Kechao Li,<sup>a</sup> Jinyu Zhao,<sup>a</sup> Zhengyi Yang,<sup>b</sup> Lingbo Zong,<sup>a</sup> Jianbin Chen,<sup>c</sup> Cong-Xia Xie<sup>a</sup>, Xiu-Xiu Zhao<sup>a\*</sup> and Xiaofei Jia<sup>a\*</sup>

<sup>a</sup> Key Laboratory of Optic-electric Sensing and Analytical Chemistry for Life Science, MOE, College of Chemistry and Molecular Engineering, Qingdao University of Science and Technology, Qingdao 266042, P. R. China.

<sup>b</sup> Chang-Kung Chuang Institute, and Shanghai Key Laboratory of Green Chemistry and Chemical Processes, School of Chemistry and Molecular Engineering, East China Normal University, Shanghai 200062, P.R. China.

<sup>c</sup> Shandong Provincial Key Laboratory of Molecular Engineering, School of Chemistry and Chemical Engineering, Qilu University of Technology (Shandong Academy of Sciences), Jinan 250353, P. R. China.

## CONTENTS

|                                                                                                                                          |    |
|------------------------------------------------------------------------------------------------------------------------------------------|----|
| 1. General methods .....                                                                                                                 | 2  |
| 2. Synthesis of catalysts .....                                                                                                          | 2  |
| 3. Preparation and characterization of Rh-H complexes.....                                                                               | 5  |
| 4. XPS spectra of copolymers and catalysts.....                                                                                          | 9  |
| 5. TGA curves of Rh/CPOL-BINAPa&PPh <sub>3</sub> and Rh/CPOL-BINAPa&PhPh <sub>3</sub> .....                                              | 13 |
| 6. General procedure for the hydroformylation of olefins.....                                                                            | 13 |
| 7. The procedure for the Rh/CPOL-(S)-BINAPa&PPh <sub>3</sub> -catalyzed hydroformylation of methyl 2-benzylacrylate.....                 | 14 |
| 8. Recycling tests of the Rh/CPOL-BINAPa&PPh <sub>3</sub> and the Rh/CPOL-BINAPa&PhPh <sub>3</sub> in hydroformylation of 1-hexene. .... | 15 |
| 9. GC spectra for olefin hydroformylation mixtures.....                                                                                  | 16 |
| 10. Standard orientation, imaginary frequencies of all stationary points.....                                                            | 17 |
| References:.....                                                                                                                         | 26 |

## 1. General methods

Unless otherwise noted, all manipulations involving air- or moisture-sensitive compounds were performed in a nitrogen-filled glovebox or using standard Schlenk techniques. Solvents were dried according to standard procedures.  $^1\text{H}$  NMR and  $^{31}\text{P}$  NMR spectra were recorded on 500 MHz by using a Bruker Avance 500 spectrometer. Chemical shifts ( $\delta$  values) were reported in ppm with internal TMS ( $^1\text{H}$ NMR),  $\text{CDCl}_3$  ( $^{13}\text{C}$  NMR), or external 85%  $\text{H}_3\text{PO}_4$  ( $^{31}\text{P}$  NMR) as the standard, respectively. ICP were determined on ICP-OES: Agilent 5110. The FT-IR spectra were measured on a Thermo (SCIENTIFIC) NICOLET iS10 spectrometer. The SEM and TEM spectra were obtained on a Zeiss sigma 500 and JEOL-2100F spectrometers, respectively.  $\text{N}_2$  sorption isotherms were obtained on MicroActive for ASAP 2460 Version 2.02. Thermogravimetric analysis was determined on TGA5500. X-ray photoelectron spectroscopy (XPS) was performed on a Thermo Scientific K-Alpha+. GC analyses were measured on an Agilent 7820A system using a FID detector. All calculations have been performed using the DFT method implemented in the commercial Gaussian 16 program package. The M062X(D3) functional in combination with SDD pseudopotential basis set for transition metals Rh and 6-311G(d,p) basis set for other elements were employed for all calculations. All of the optimized geometries mentioned were built by Gaussview 6.0. Chiral HPLC analyses were performed on a Chiralpak AS-H liquid chromatography.

## 2. Synthesis of catalysts

**Synthesis of 1,1',1'',1'''-(((6,6'-divinyl-[1,1'-binaphthalene]-2,2'-diyl)bis(oxy)) bis (phosphinetriyl)) tetrakis(1H-pyrrole) (3)**

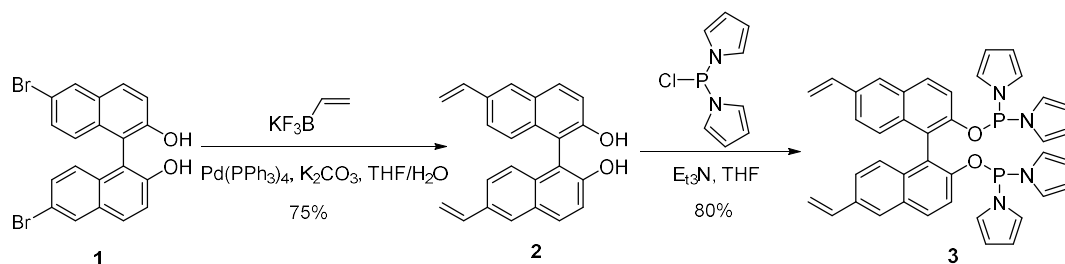

Compound **3** was obtained by following the reported literature procedure.<sup>[1]</sup> Under nitrogen, the compound **1** (500.0 mg, 1.13 mmol),  $\text{C}_2\text{H}_3\text{BF}_3\text{K}$  (664.0 mg, 4.95mmol),  $\text{K}_2\text{CO}_3$  (684.14 mg, 4.95mmol) and  $\text{Pd}(\text{PPh}_3)_4$  (57.78 mg, 0.0495mmol) were dissolved in a mixture solvent (6 mL THF and 1 mL  $\text{H}_2\text{O}$ ) in Schlenk tube. The mixture was heated to  $90^\circ\text{C}$  for 24 h, then was purified by column chromatography (PE :EA = 2:1). The compound **2** (285.5mg, 75% yield) was obtained as a light yellow solid.

Under nitrogen, THF solution of compound **2** (226.5mg, 0.67 mmol) was added dropwise to a mixture of triethylamine (149.8mg, 1.48 mmol) and chlorodipyrrolylphosphine (293.9 mg, 1.48 mmol) and THF (5.0 mL) in Schlenk tube at  $0^\circ\text{C}$ . After 24 h of stirring at room temperature, the mixture was purified by column chromatography (PE:EA = 20:1). Under reduced pressure to remove the solvent, the compound **3** was evaporated and obtained in 80% yield (356.3 mg).  $^1\text{H}$  NMR ( $\text{CDCl}_3$ , 500 MHz): $\delta$  7.93 (d,  $J$  = 8.5 Hz, 2H), 7.87 (s, 2H), 7.53 (d,  $J$  = 8.3 Hz, 2H), 7.25-7.20 (m, 2H), 6.96-6.91 (m, 2H), 6.59 (d,  $J$  = 27.0 Hz, 8H), 6.21 (d,  $J$  = 27.0 Hz, 8H), 5.88 (d,  $J$  = 18.0 Hz, 2H), 5.39 (d,  $J$  = 10.0 Hz, 2H) ppm;  $^{31}\text{P}$  NMR (202 MHz,  $\text{CDCl}_3$ ): $\delta$ 108.9ppm.

### Synthesis of Rh/CPOL-BINAPa&PPh<sub>3</sub>.

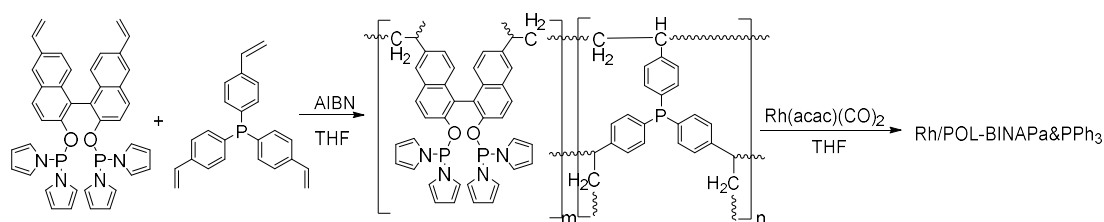

Under  $\text{N}_2$  atmosphere, tris(4-vinylphenyl) phosphane (137.08 mg, 0.40 mmol), the compound **3** (86.1 mg, 0.13 mmol) and AIBN (5.0 mg, 0.03 mmol) were added into

THF (4mL) in Schlenk flask. After stirring for 5 minutes at room temperature, the mixture was heated to 100 °C for 24 h. The crude product was then washed with toluene and further centrifuged (9000 rpm, 5 min). After removing the residual solvent under reduced pressure, the copolymer of POL-BINAPa&PPh<sub>3</sub> (180.92 mg) was obtained.

Under N<sub>2</sub> atmosphere, CPOL-BINAPa&PPh<sub>3</sub> (180.92 mg) and Rh(acac)(CO)<sub>2</sub> (9.25mg) was added to THF (4 mL). After stirring for 24 h under N<sub>2</sub> at room temperature, the crude product was separated by using centrifuge and further washed by toluene. After removing the residual solvent under reduced pressure, the Rh/CPOL-BINAPa&PPh<sub>3</sub> (170.0 mg) was obtained.

### Synthesis of Rh/CPOL-BINAPa&PhPh<sub>3</sub>.

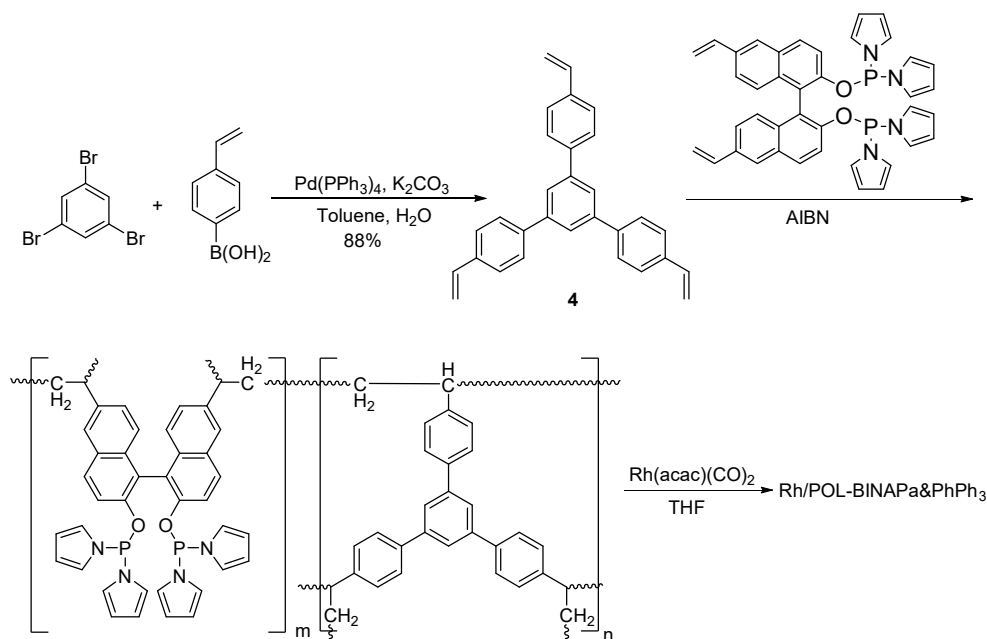

Under N<sub>2</sub> atmosphere, the 1,3,5-tribromobenzene (500 mg, 1.59 mmol), 4-vinylbenzeneboronic acid (1.4 g, 9.53 mmol), K<sub>2</sub>CO<sub>3</sub> (1317.1 mg, 9.53 mmol) and Pd(PPh<sub>3</sub>)<sub>4</sub> (110.10 mg, 0.095 mmol) were dissolved in mixture solvent (6 mL toluene and 1 mL H<sub>2</sub>O) in Schlenk tube. The mixture was heated to 120 °C for 24 h. The crude product then was purified by column chromatography. The compound **4** (538.3 mg, 88% yield) was obtained as a white solid. <sup>1</sup>H NMR (500 MHz, CDCl<sub>3</sub>): δ 7.77 (s, 3H), 7.66 (d, *J*=8.5 Hz, 6H), 7.52 (d, *J*=8.5 Hz, 6H), 6.78 (dd, *J*=17.5, 11.0 Hz, 3H), 5.82 (d, *J*=17.5 Hz, 3H), 5.29 (d, *J*=11.0 Hz, 3H) ppm<sup>[2]</sup>.

Under N<sub>2</sub> atmosphere, tris(4-vinylphenyl)benzene(234.56 mg, 0.61mmol), compound **3** (134.85 mg, 0.203 mmol) and AIBN (8.0 mg, 0.049 mmol) were dissolved in THF (4 mL) in Schlenk flask. After stirring for 10 minutes at room temperature, the mixture was heated to 100 °C for 24 h. After the crude product was washed by toluene and separated by using a centrifuge (9000 rpm, 5 min), the copolymer POL-BINPa&PhPh<sub>3</sub> (295 mg) was obtained as a light yellow solid.

In glove box, CPOL-BINAPa&PhPh<sub>3</sub> (100 mg) and Rh(acac)(CO)<sub>2</sub> (4.74mg) was added to THF (4mL). After stirring for 24 h under N<sub>2</sub> at room temperature, the crude product was washed by toluene and was separated by using centrifuge. The light yellow catalyst Rh/CPOL-BINAPa&PhPh<sub>3</sub> (84mg) was obtained.

The catalysts of Rh/CPOL-(*S*)-BINAPa&PPh<sub>3</sub> and Rh/CPOL-(*S*)-BINAPa&PhPh<sub>3</sub> were prepared by using (*S*)-BINOL as starting material according to the procedures of synthesis Rh/CPOL-BINAPa&PPh<sub>3</sub> and Rh/CPOL-BINAPa&PhPh<sub>3</sub>.

### 3. Preparation and characterization of Rh-H complexes

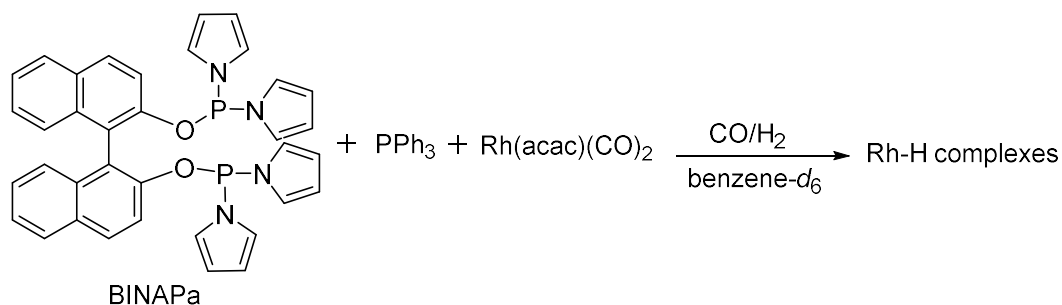

In a glove box, the mixture of Rh(acac)(CO)<sub>2</sub> (4.1 mg, 0.016 mmol), PPh<sub>3</sub> (12.9 mg, 0.048 mmol) and BINAPa (10 mg, 0.016mmol) in benzene-*d*<sub>6</sub> (1.5 mL) was stirred for 0.5 hour at room temperature in a 5 mL glass vial, which was then transferred into a stainless steel autoclave and sealed. The autoclave was purged with H<sub>2</sub> three times and subsequently charged with CO (10 bar) and H<sub>2</sub> (10 bar). The autoclave was then heated to 40 °C (oil bath) and stirred at the temperature for 12 h.

After cooling the autoclave to 0°C, the syngas was carefully released, and the solution was submitted to NMR and IR analysis.

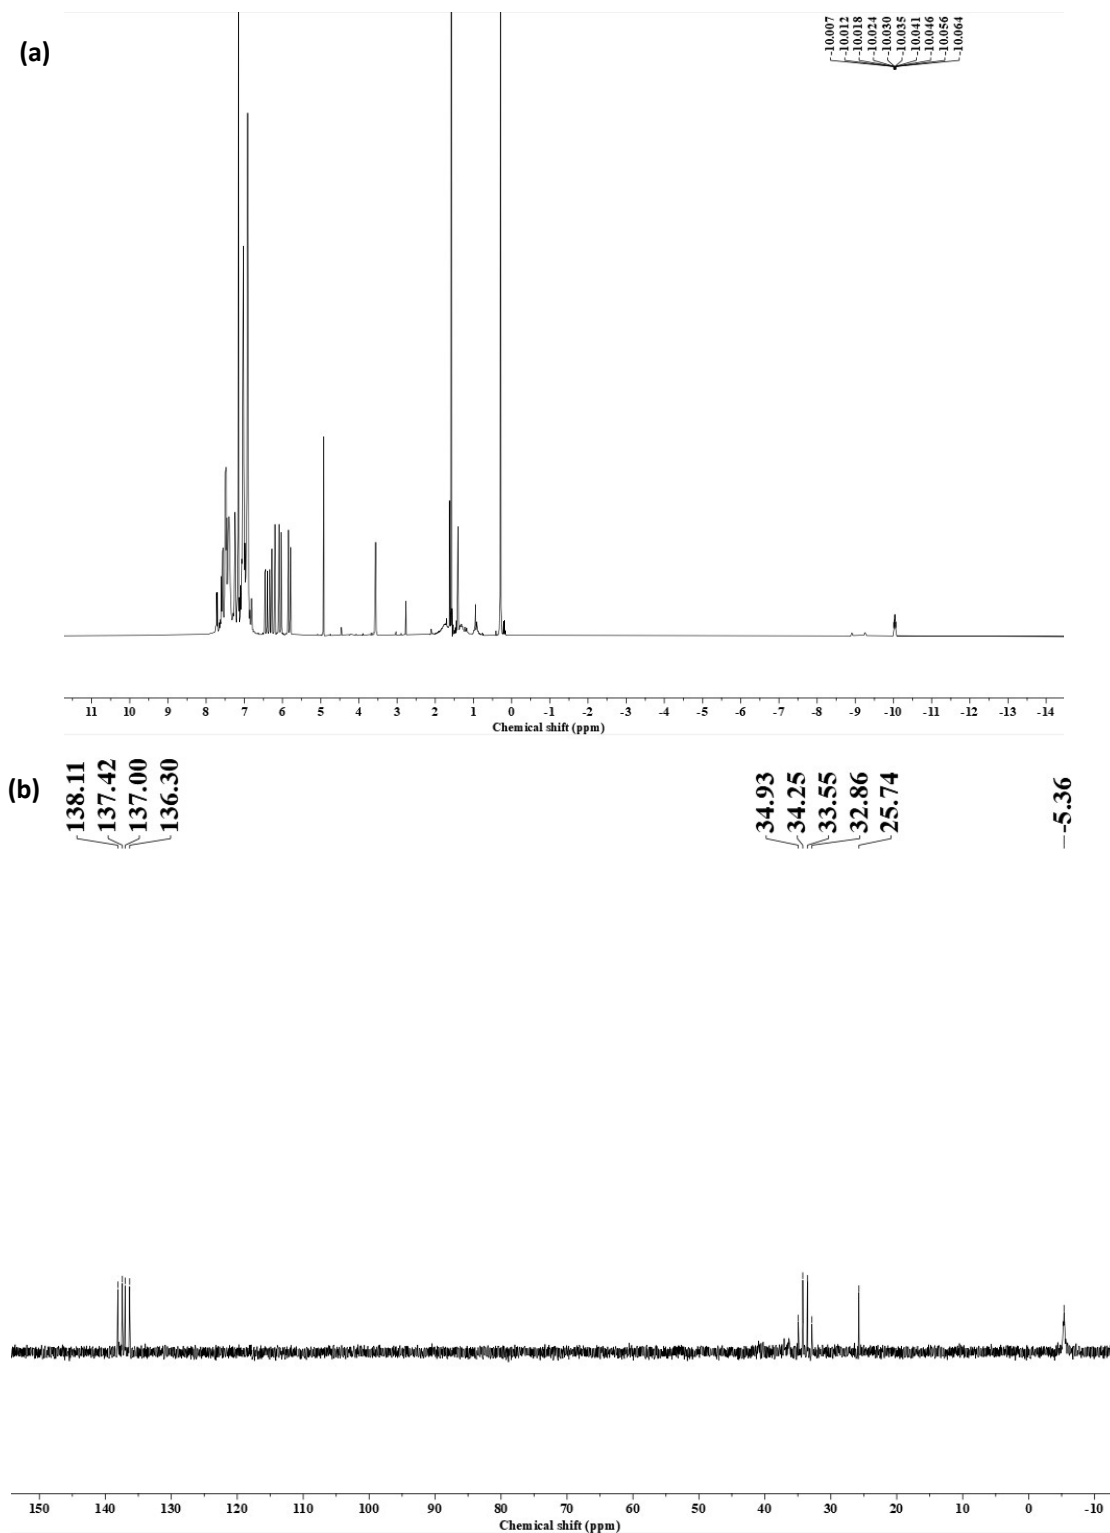

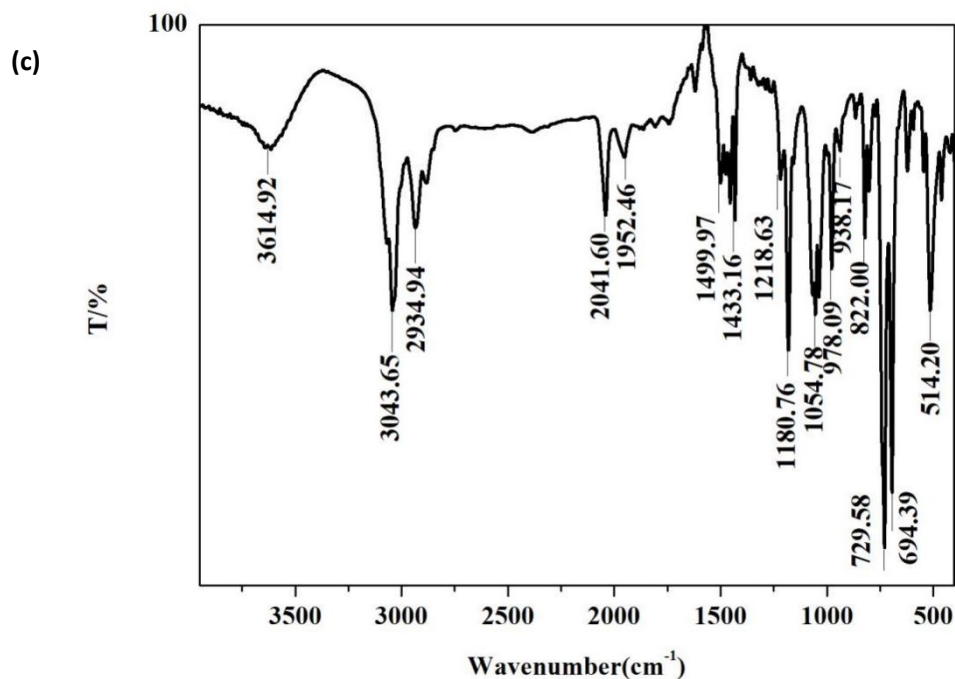

**Fig S1.** (a)  $^1\text{H}$  NMR spectra, (b)  $^{31}\text{P}$  NMR spectra, (c) FT-IR spectra of

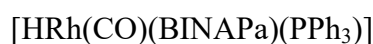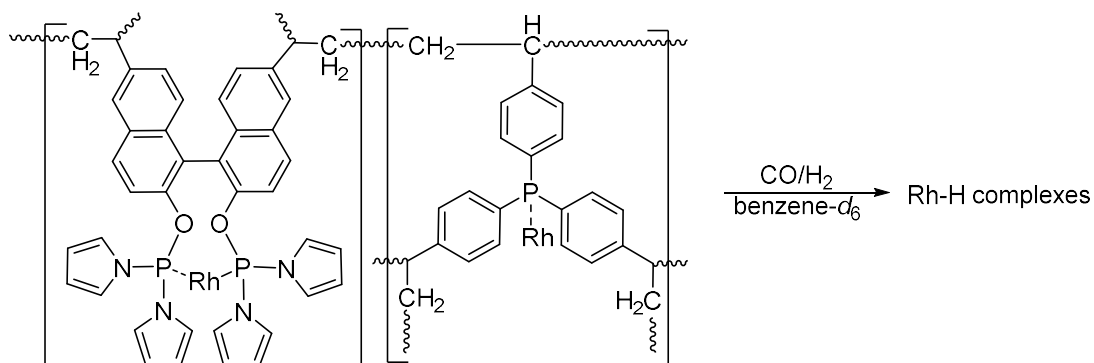

In a glove box, Rh/CPOL-BINAPa&PPh<sub>3</sub> (10 mg, Rh loading at 5.3 wt%) and benzene-*d*<sub>6</sub> (1.5 mL) were added in a glass vial, which was then transferred into a stainless steel autoclave and sealed. The autoclave was purged with H<sub>2</sub> three times and subsequently charged with CO (10 bar) and H<sub>2</sub> (10 bar). The autoclave was then heated to 40 °C (oil bath) and stirred at the temperature for 12 h. After cooling the autoclave to 0°C, the syngas was carefully released, and the mixture was submitted to IR analysis.

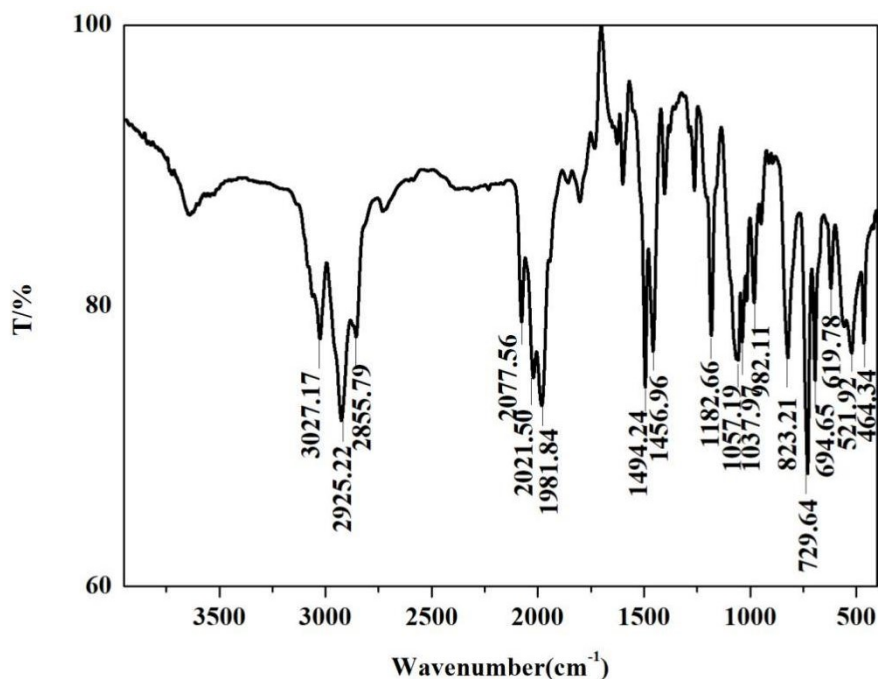

**Fig S2.** FT-IR spectra of Rh-H complexes

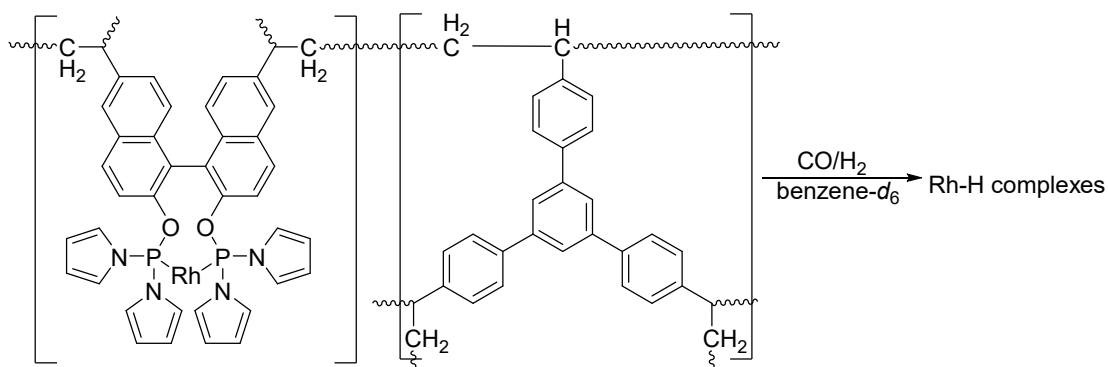

In a glove box, Rh/CPOL-BINAPa&PPh<sub>3</sub> (10 mg, Rh loading at 4.6 wt%) and benzene-*d*<sub>6</sub> (1.5 mL) were added in a glass vial, which was then transferred into a stainless steel autoclave and sealed. The autoclave was purged with H<sub>2</sub> three times and subsequently charged with CO (10 bar) and H<sub>2</sub> (10 bar). The autoclave was then heated to 40 °C (oil bath) and stirred at the temperature for 12 h. After cooling the autoclave to 0°C, the syngas was carefully released, and the mixture was submitted to IR analysis.



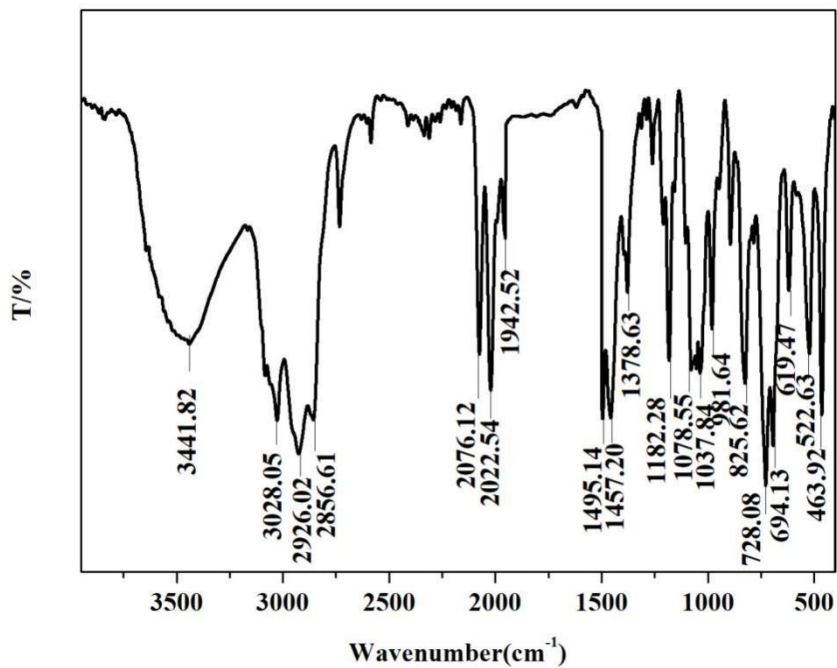

Fig S3. FT-IR spectra of Rh-H complexes

#### 4. XPS spectra of copolymers and catalysts.

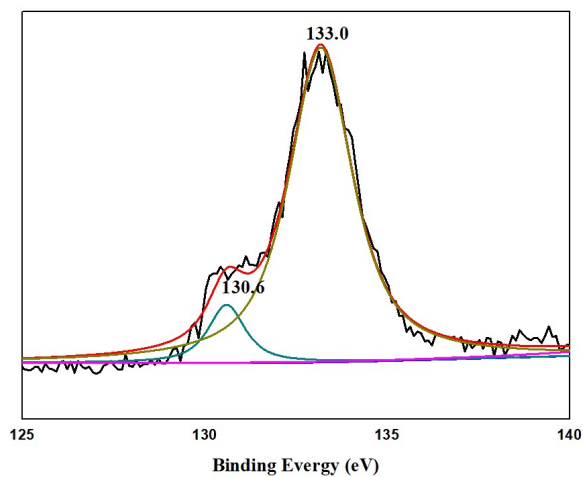

Fig.S4. P2p XPS spectra of CPOL-BINAPa&PPh<sub>3</sub>

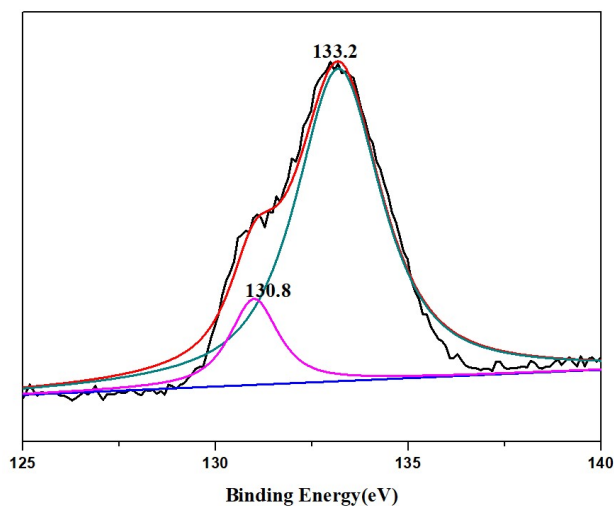

**Fig.S5. P2p XPS spectra of Rh/CPOL-BINAPa&PPh<sub>3</sub>**

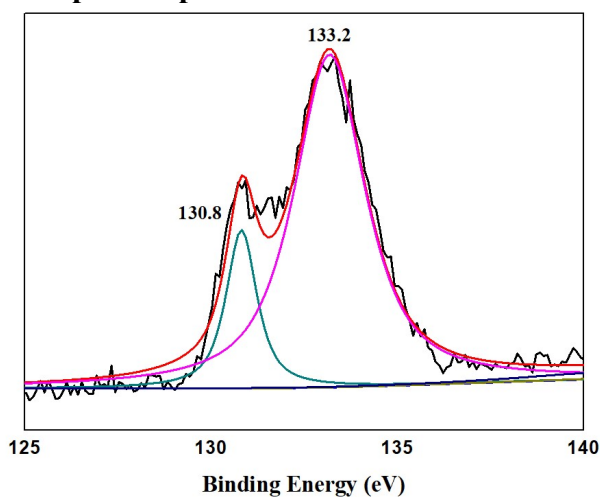

**Fig.S6. P2p XPS spectra of the recovered Rh/CPOL-BINAPa&PPh<sub>3</sub>**

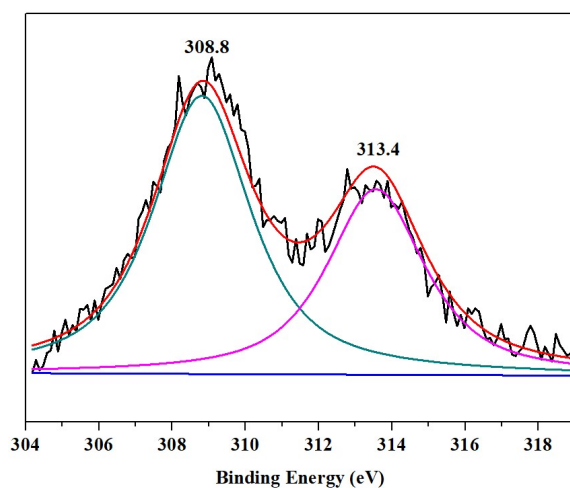

**Fig.S7. Rh3d<sub>3/2</sub> and Rh3d<sub>5/2</sub> XPS spectra of Rh/CPOL-BINAPa&PPh<sub>3</sub>**

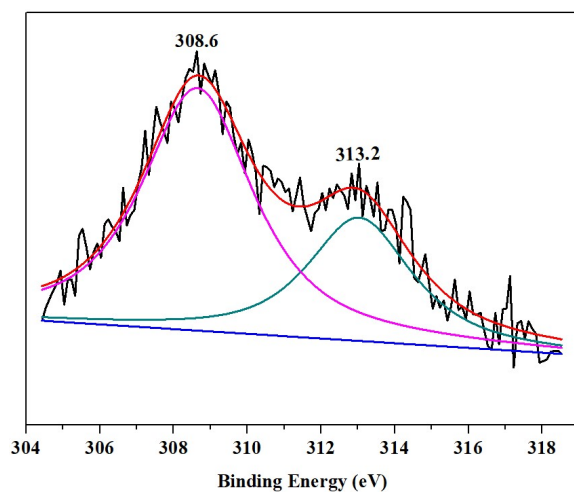

**Fig.S8. Rh3d<sub>3/2</sub> and Rh3d<sub>5/2</sub> XPS spectra of the recovered Rh/CPOL-BINAPa&PPh<sub>3</sub>**

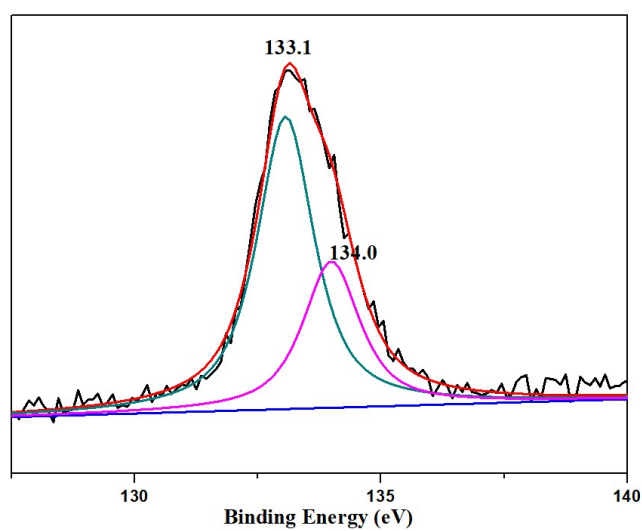

**Fig.S9. P2p XPS spectra of CPOL-BINAPa&PhPh<sub>3</sub>**

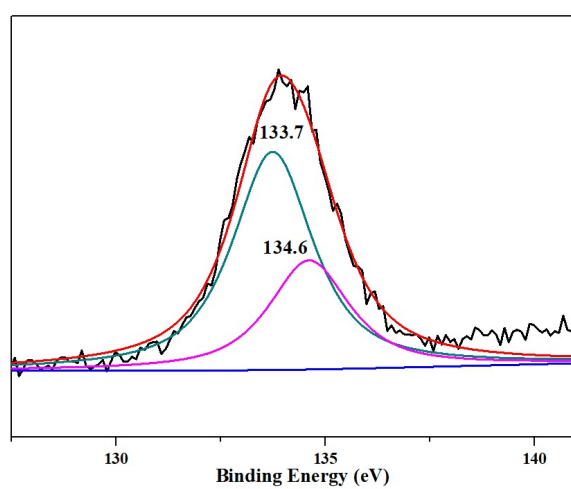

**Fig.S10. P2p XPS spectra of Rh/CPOL-BINAPa&PhPh<sub>3</sub>**

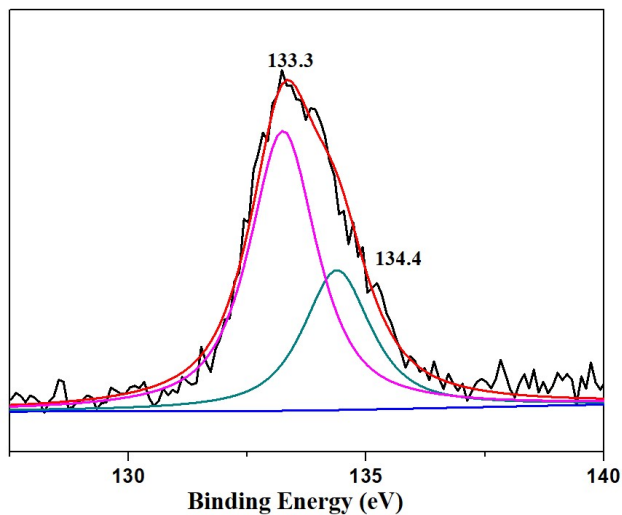

**Fig.S11. P2p XPS spectra of the recovered Rh/CPOL-BINAPa&PhPh<sub>3</sub>**

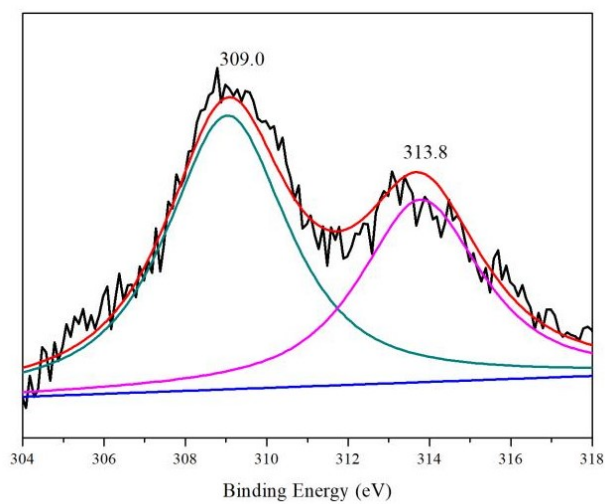

**Fig.S12. Rh 3d<sub>3/2</sub> and Rh 3d<sub>5/2</sub> XPS spectra of Rh/CPOL-BINAPa&PhPh<sub>3</sub>**

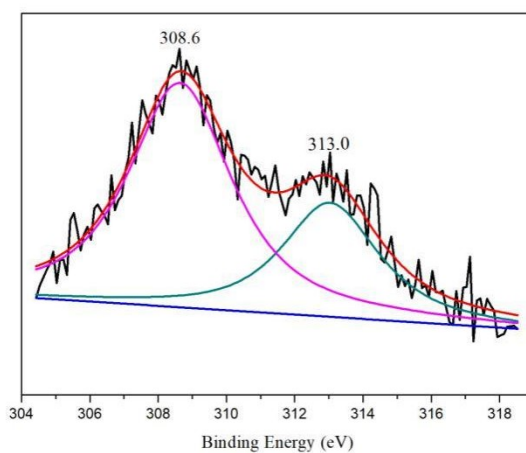

**Fig.S13. Rh3d<sub>3/2</sub> and Rh3d<sub>5/2</sub> XPS spectra of the recovered Rh/CPOL-BINAPa&PhPh<sub>3</sub>**

## 5. TGA curves of Rh/CPOL-BINAPa&PPh<sub>3</sub> and Rh/CPOL-BINAPa&PhPh<sub>3</sub>.

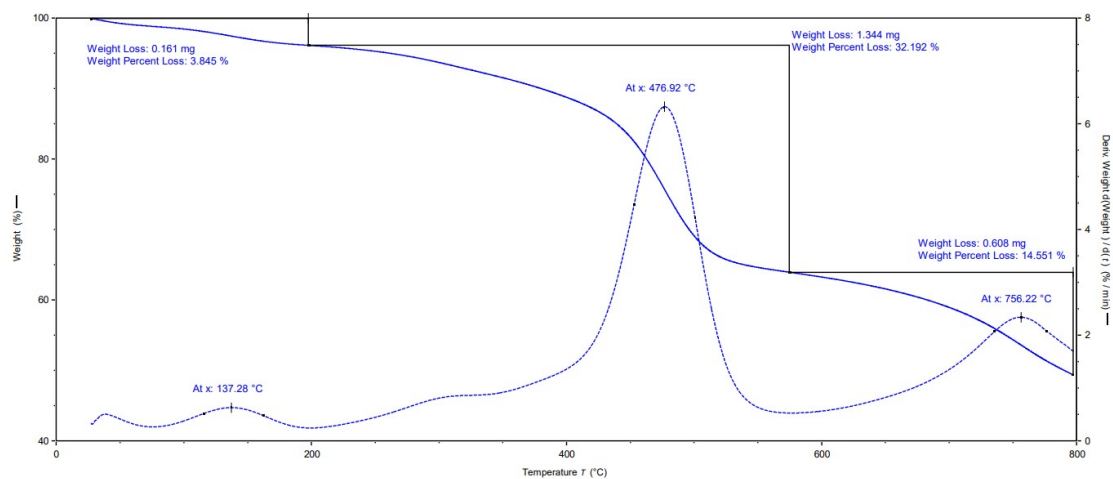

Fig S14. TGA curve of Rh/CPOL-BINAPa&PPh<sub>3</sub>

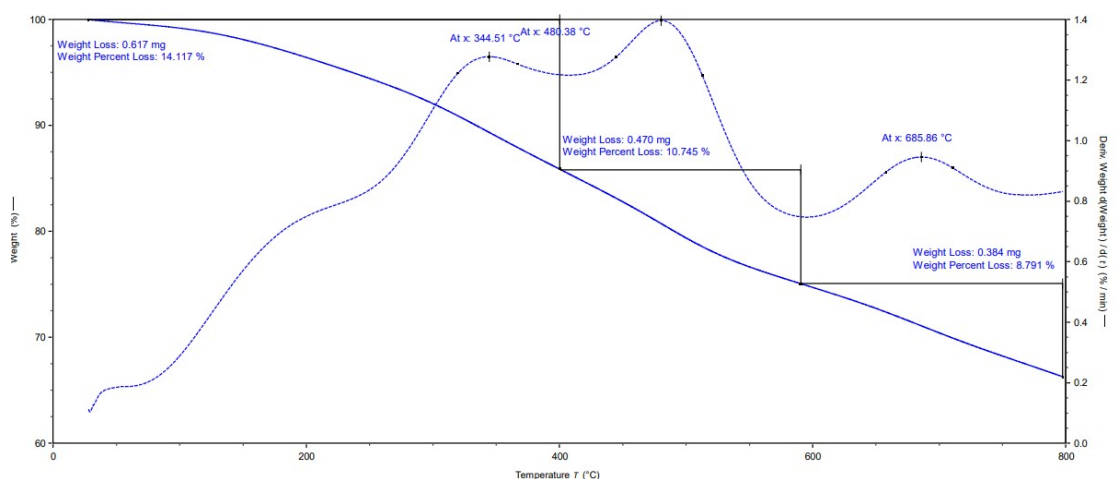

Fig S15. TGA curve of Rh/CPOL-BINAPa&PhPh<sub>3</sub>

## 6. General procedure for the hydroformylation of olefins.

In a glove box, an autoclave with a magnetic stirring bar was charged with Rh/POL-BINAPa&PPh<sub>3</sub> (2.1 mg), olefin (3.9 mmol), toluene (1.0 mL) and dodecane (as the internal standard). The mixture was purged with H<sub>2</sub> three times and subsequently charged with CO (10 bar) and H<sub>2</sub> (10 bar). The autoclave was then heated to 100 °C (oil bath) for 5 h. The autoclave was cooled in ice water, and the gas was carefully released in a well-ventilated hood. The mixture was subsequently analyzed by gas chromatography (GC).

## 7. The procedure for the Rh/CPOL-(S)-BINAPa&PPh<sub>3</sub>-catalyzed hydroformylation of methyl 2-benzylacrylate

In a glove box, a glass vial with a magnetic stirring bar was charged with Rh/CPOL-(S)-BINAPa&PPh<sub>3</sub> (14.5 mg), methyl 2-benzylacrylate (0.25 mmol) and toluene (1.0 mL). The vial was then transferred to an autoclave, which was purged with hydrogen for three times and subsequently charged with CO (5 bar) and H<sub>2</sub> (5 bar). The autoclave was then heated to 80 °C (oil bath) and was kept at this temperature for 12 h. The autoclave was cooled in ice water, and the gas was carefully released in a well-ventilated hood. The mixture was purified by chromatography on silicagel to give the chiral aldehyde, which subsequently was analyzed by chiral HPLC on Chiralpak AS-H column for determination of the ee value. Conditions: hexane/isopropanol = 99:1, flow rate = 1.0 mL/min, uv-vis detection at  $\lambda = 254$  nm,  $t_R = 25.1$  min(*S*),  $t_R = 29.6$  min(*R*).

**Methyl 2-benzyl-4-oxobutanoate**<sup>[3]</sup>: <sup>1</sup>H NMR (CDCl<sub>3</sub>, 400 MHz):  $\delta$  9.68 (s, 1H), 7.31-7.22 (m, 3H), 7.15-7.12 (m, 2H), 3.66 (s, 3H), 3.20-3.04 (m, 2H), 2.86-2.72 (m, 2H), 2.54-2.48 (m, 1H) ppm.

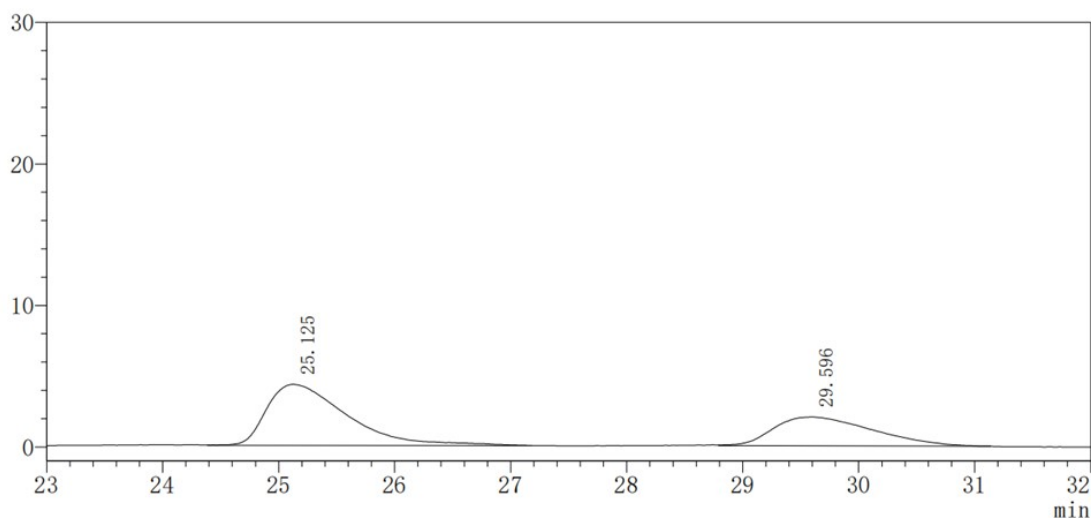

| Index  | Time   | Area   | Area%   | Height | Height% |
|--------|--------|--------|---------|--------|---------|
| 1      | 25.125 | 148485 | 69.799  | 3493   | 71.755  |
| 2      | 29.596 | 64247  | 30.201  | 1375   | 28.245  |
| Totals |        | 212732 | 100.000 | 4868   | 100.000 |

## 8. Recycling tests of the Rh/CPOL-BINAPa&PPh<sub>3</sub> and the Rh/CPOL-BINAPa&PhPh<sub>3</sub> in hydroformylation of 1-hexene.

In a glove box, an autoclave with a magnetic stirring bar was charged with Rh/POL-BINAPa&PPh<sub>3</sub> (2.1 mg) or Rh/POL-BINAPa&PhPh<sub>3</sub> (2.4 mg), olefin (0.48 mL), toluene (1.0 mL) and dodecane as the internal standard. The autoclave was purged with hydrogen for three times and subsequently charged with CO (10 bar) and H<sub>2</sub> (10 bar). The autoclave was then heated to 100 °C (oil bath) and was kept at this temperature for 5 h. The autoclave was cooled in ice water, and the gas was carefully released in a well-ventilated hood. The catalyst of reaction mixture was separated in air by using centrifuge and used to test next recycling reaction with the same condition and procedure. The mixture was analyzed by gas chromatography.

**Table S1.** Rh/CPOL-BINAPa&PPh<sub>3</sub> catalyzed the hydroformylation of 1-hexene

| Recycle | Conversion (%) | Aldehydes (%) | Linear (%) <sup>a</sup> | Iso. (%) | [H] (%) |
|---------|----------------|---------------|-------------------------|----------|---------|
| 1       | 99.6           | 89.7          | 99.4                    | 9.2      | 0.7     |
| 2       | 99.6           | 88.9          | 99.2                    | 9.8      | 0.8     |
| 3       | 99.6           | 89.5          | 99.1                    | 9.4      | 0.7     |
| 4       | 98.8           | 86.2          | 98.7                    | 11.4     | 1.0     |
| 5       | 99.4           | 84.2          | 99.3                    | 14.3     | 0.8     |

<sup>a</sup>Percentage of linear aldehyde in all aldehydes.

**Table S2.** Rh/CPOL-BINAPa&PhPh<sub>3</sub> catalyzed the hydroformylation of 1-hexene

| Recycle | Conversion (%) | Aldehydes (%) | Linear (%) <sup>a</sup> | Iso. (%) | [H] (%) |
|---------|----------------|---------------|-------------------------|----------|---------|
| 1       | 99.7           | 90.5          | 99                      | 8.5      | 0.7     |
| 2       | 99.5           | 84.9          | 99.2                    | 13.4     | 1.2     |
| 3       | 99.3           | 76.7          | 99.1                    | 21.8     | 0.7     |
| 4       | 98.8           | 51.3          | 98.2                    | 46.7     | 0.8     |
| 5       | 99.7           | 45.2          | 96.3                    | 53.8     | 0.6     |

<sup>a</sup>Percentage of linear aldehyde in all aldehydes.

## 9. GC spectra for olefin hydroformylation mixtures

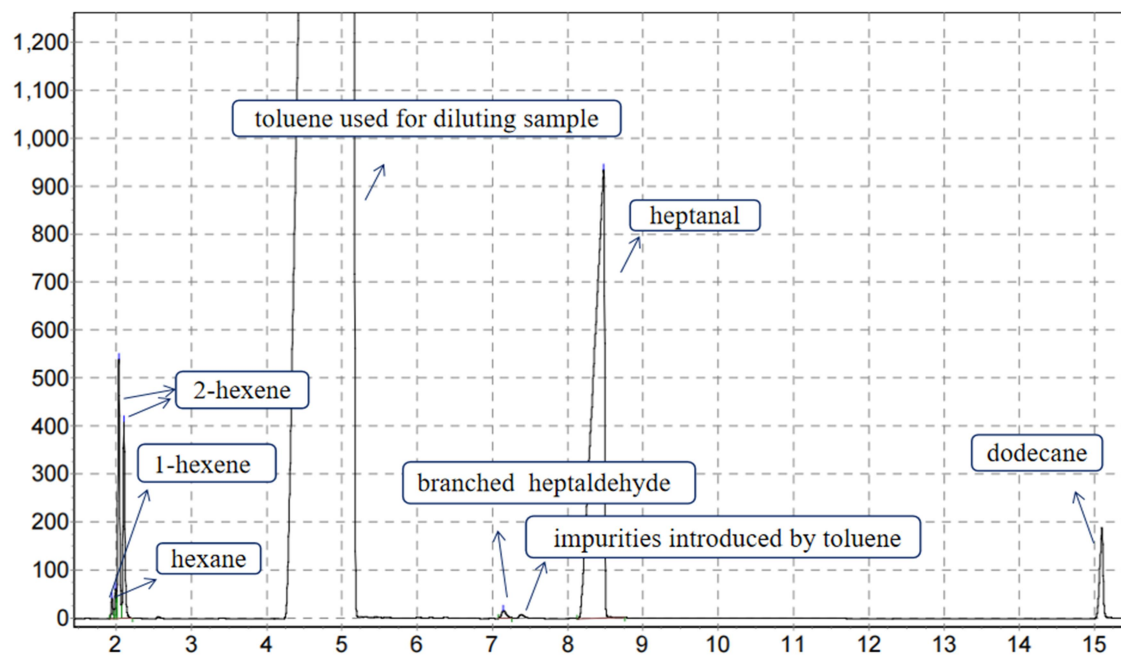

Fig S16. GC spectrum for 1-hexene hydroformylation mixture

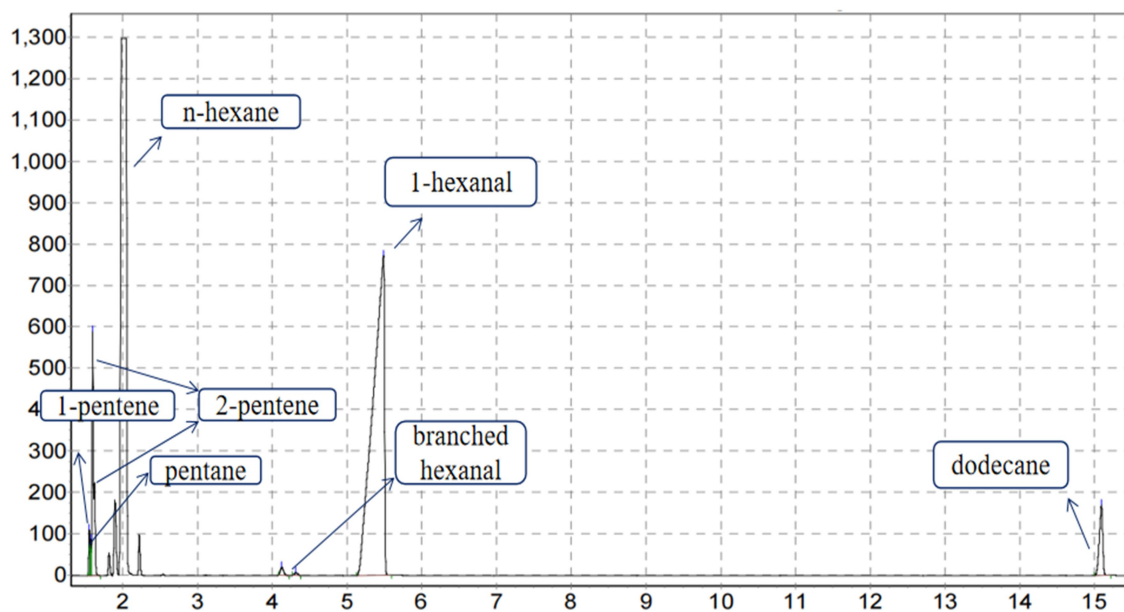

Fig S17. GC spectrum for 1-pentene hydroformylation mixture



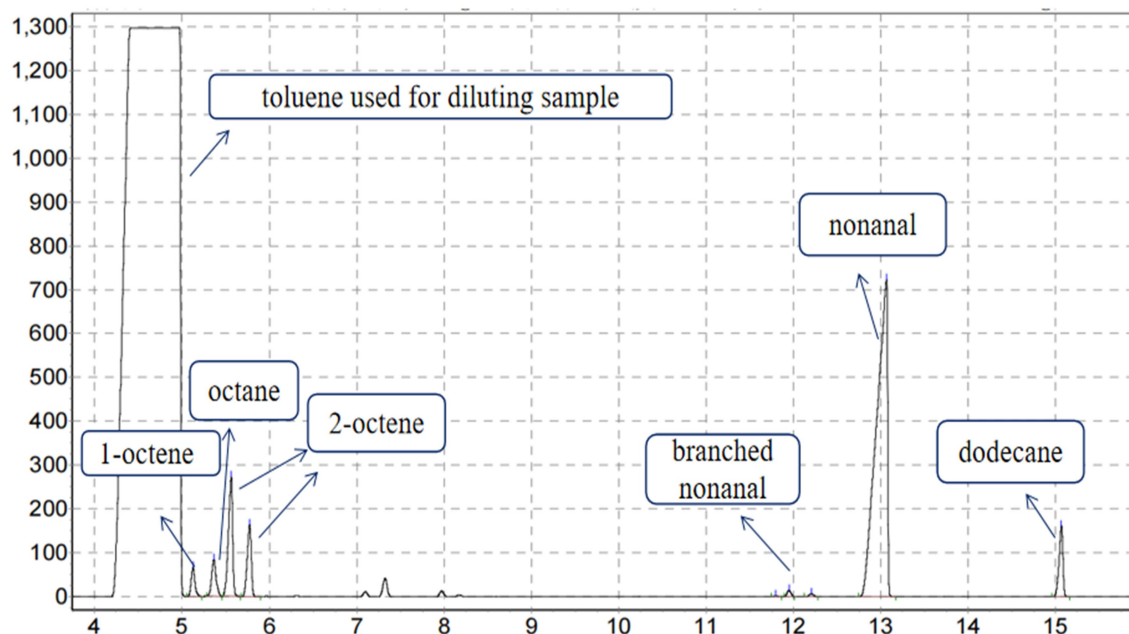

**Fig S18. GC spectrum for 1-octene hydroformylation mixture**

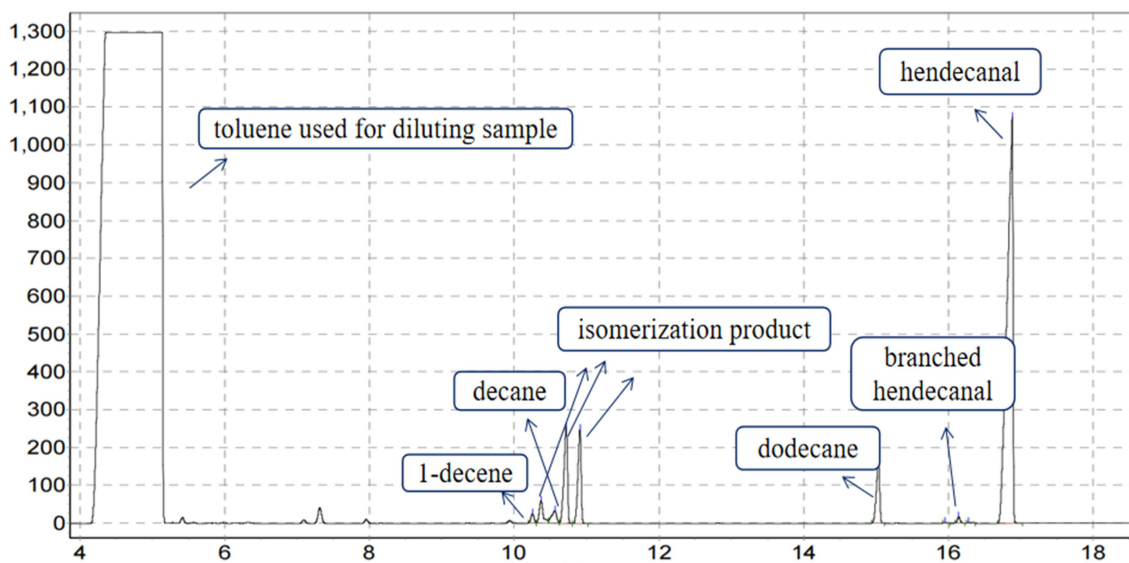

**Fig S19. GC spectrum for 1-decene hydroformylation mixture**

## 10. Standard orientation, imaginary frequencies of all stationary points

### Structure A

| Center Number | Atomic Number | Atomic Type | Coordinates (Angstroms) |           |           |
|---------------|---------------|-------------|-------------------------|-----------|-----------|
|               |               |             | X                       | Y         | Z         |
| 1             | 45            | 0           | -0.008160               | -1.303659 | -0.291007 |

|    |    |   |           |           |           |
|----|----|---|-----------|-----------|-----------|
| 2  | 1  | 0 | -0.047301 | -0.661009 | -1.749306 |
| 3  | 6  | 0 | 0.021747  | -2.092014 | 1.490320  |
| 4  | 8  | 0 | 0.032445  | -2.573735 | 2.529845  |
| 5  | 15 | 0 | -2.066785 | -0.083468 | -0.033571 |
| 6  | 6  | 0 | -2.501775 | 0.517380  | 1.668583  |
| 7  | 6  | 0 | -3.783669 | 0.400453  | 2.220031  |
| 8  | 6  | 0 | -1.490196 | 1.108730  | 2.436913  |
| 9  | 6  | 0 | -4.046423 | 0.871172  | 3.505530  |
| 10 | 1  | 0 | -4.579730 | -0.064231 | 1.652647  |
| 11 | 6  | 0 | -1.758268 | 1.591003  | 3.715195  |
| 12 | 1  | 0 | -0.485793 | 1.185872  | 2.038553  |
| 13 | 6  | 0 | -3.037740 | 1.471849  | 4.254242  |
| 14 | 1  | 0 | -5.042805 | 0.765233  | 3.920417  |
| 15 | 1  | 0 | -0.961125 | 2.047681  | 4.290673  |
| 16 | 1  | 0 | -3.244767 | 1.836726  | 5.254168  |
| 17 | 6  | 0 | -3.574380 | -1.069929 | -0.497537 |
| 18 | 6  | 0 | -3.573187 | -2.449488 | -0.263145 |
| 19 | 6  | 0 | -4.722942 | -0.481719 | -1.043445 |
| 20 | 6  | 0 | -4.694283 | -3.222219 | -0.555242 |
| 21 | 1  | 0 | -2.682731 | -2.919907 | 0.135656  |
| 22 | 6  | 0 | -5.840399 | -1.257553 | -1.346434 |
| 23 | 1  | 0 | -4.747022 | 0.583141  | -1.239874 |
| 24 | 6  | 0 | -5.830350 | -2.628648 | -1.100888 |
| 25 | 1  | 0 | -4.673447 | -4.289951 | -0.367769 |
| 26 | 1  | 0 | -6.718332 | -0.787740 | -1.776197 |
| 27 | 1  | 0 | -6.699508 | -3.231436 | -1.339546 |
| 28 | 6  | 0 | -2.299041 | 1.435678  | -1.075438 |
| 29 | 6  | 0 | -2.158804 | 1.313048  | -2.465882 |
| 30 | 6  | 0 | -2.593599 | 2.693432  | -0.539110 |
| 31 | 6  | 0 | -2.324418 | 2.416388  | -3.296379 |
| 32 | 1  | 0 | -1.916592 | 0.349528  | -2.899437 |
| 33 | 6  | 0 | -2.743594 | 3.802626  | -1.373025 |
| 34 | 1  | 0 | -2.711036 | 2.814146  | 0.530285  |
| 35 | 6  | 0 | -2.614440 | 3.668098  | -2.751798 |
| 36 | 1  | 0 | -2.221104 | 2.299451  | -4.369506 |
| 37 | 1  | 0 | -2.968753 | 4.770544  | -0.938848 |
| 38 | 1  | 0 | -2.738131 | 4.529294  | -3.398890 |
| 39 | 15 | 0 | 2.072908  | -0.079126 | -0.091980 |
| 40 | 6  | 0 | 2.513411  | 1.031424  | -1.511159 |
| 41 | 6  | 0 | 3.801288  | 1.090254  | -2.056243 |
| 42 | 6  | 0 | 1.514572  | 1.849867  | -2.053677 |
| 43 | 6  | 0 | 4.082003  | 1.950401  | -3.117029 |
| 44 | 1  | 0 | 4.588799  | 0.460730  | -1.662723 |
| 45 | 6  | 0 | 1.800502  | 2.718860  | -3.102957 |

|    |   |   |           |           |           |
|----|---|---|-----------|-----------|-----------|
| 46 | 1 | 0 | 0.506732  | 1.801338  | -1.661669 |
| 47 | 6 | 0 | 3.085550  | 2.769749  | -3.640159 |
| 48 | 1 | 0 | 5.082927  | 1.976102  | -3.533647 |
| 49 | 1 | 0 | 1.012706  | 3.345439  | -3.505580 |
| 50 | 1 | 0 | 3.306171  | 3.437946  | -4.465222 |
| 51 | 6 | 0 | 3.573376  | -1.172360 | 0.035436  |
| 52 | 6 | 0 | 3.575350  | -2.388677 | -0.657092 |
| 53 | 6 | 0 | 4.713107  | -0.813707 | 0.767417  |
| 54 | 6 | 0 | 4.690162  | -3.222612 | -0.626884 |
| 55 | 1 | 0 | 2.694520  | -2.684090 | -1.213377 |
| 56 | 6 | 0 | 5.823525  | -1.655140 | 0.807439  |
| 57 | 1 | 0 | 4.736205  | 0.121618  | 1.312636  |
| 58 | 6 | 0 | 5.816034  | -2.860419 | 0.109411  |
| 59 | 1 | 0 | 4.672622  | -4.160562 | -1.170629 |
| 60 | 1 | 0 | 6.694214  | -1.365945 | 1.385765  |
| 61 | 1 | 0 | 6.679868  | -3.514993 | 0.142782  |
| 62 | 6 | 0 | 2.316248  | 1.037272  | 1.376258  |
| 63 | 6 | 0 | 2.214939  | 0.482569  | 2.661368  |
| 64 | 6 | 0 | 2.552134  | 2.411497  | 1.259185  |
| 65 | 6 | 0 | 2.361497  | 1.276712  | 3.794074  |
| 66 | 1 | 0 | 2.026489  | -0.577704 | 2.782025  |
| 67 | 6 | 0 | 2.685078  | 3.209251  | 2.396480  |
| 68 | 1 | 0 | 2.638300  | 2.865818  | 0.280420  |
| 69 | 6 | 0 | 2.594562  | 2.646446  | 3.665693  |
| 70 | 1 | 0 | 2.289306  | 0.825100  | 4.777294  |
| 71 | 1 | 0 | 2.867692  | 4.272356  | 2.284110  |
| 72 | 1 | 0 | 2.705230  | 3.266511  | 4.548226  |
| 73 | 6 | 0 | -0.043351 | -2.915602 | -1.322355 |
| 74 | 8 | 0 | -0.084149 | -3.851001 | -1.988726 |

---

0 imaginary frequencies

### Structure B

---

| Center<br>Number | Atomic<br>Number | Atomic<br>Type | Coordinates (Angstroms) |           |           |
|------------------|------------------|----------------|-------------------------|-----------|-----------|
|                  |                  |                | X                       | Y         | Z         |
| 1                | 6                | 0              | -1.430821               | 0.054975  | -2.756348 |
| 2                | 6                | 0              | -0.548774               | 0.376875  | -3.754732 |
| 3                | 6                | 0              | 0.612438                | 1.140719  | -3.486081 |
| 4                | 6                | 0              | 0.869352                | 1.559978  | -2.140441 |
| 5                | 6                | 0              | -0.027402               | 1.175365  | -1.097900 |
| 6                | 6                | 0              | -1.165309               | 0.455528  | -1.425745 |
| 7                | 1                | 0              | 1.307588                | 1.188882  | -5.529726 |
| 8                | 1                | 0              | -2.337593               | -0.489535 | -2.985666 |
| 9                | 1                | 0              | -0.749750               | 0.063249  | -4.773176 |

|    |    |   |           |           |           |
|----|----|---|-----------|-----------|-----------|
| 10 | 6  | 0 | 1.510865  | 1.520157  | -4.516772 |
| 11 | 6  | 0 | 2.009144  | 2.373677  | -1.897509 |
| 12 | 6  | 0 | 2.851715  | 2.733720  | -2.922542 |
| 13 | 6  | 0 | 2.608517  | 2.298765  | -4.245277 |
| 14 | 1  | 0 | 2.206549  | 2.715582  | -0.889557 |
| 15 | 1  | 0 | 3.710963  | 3.361650  | -2.714815 |
| 16 | 1  | 0 | 3.285034  | 2.587993  | -5.041205 |
| 17 | 6  | 0 | 0.926478  | 0.804617  | 1.198187  |
| 18 | 6  | 0 | 0.188753  | 1.578130  | 0.325843  |
| 19 | 6  | 0 | -0.450062 | 2.755853  | 0.838339  |
| 20 | 6  | 0 | -0.327288 | 3.089206  | 2.223549  |
| 21 | 6  | 0 | 0.409173  | 2.226790  | 3.072329  |
| 22 | 6  | 0 | 1.017619  | 1.107102  | 2.575389  |
| 23 | 1  | 0 | -1.312158 | 3.381955  | -1.045430 |
| 24 | 6  | 0 | -1.212130 | 3.618792  | 0.006055  |
| 25 | 6  | 0 | -0.961194 | 4.257815  | 2.717807  |
| 26 | 1  | 0 | 0.476559  | 2.455867  | 4.129915  |
| 27 | 1  | 0 | 1.539725  | 0.429249  | 3.237991  |
| 28 | 6  | 0 | -1.688681 | 5.071518  | 1.884768  |
| 29 | 6  | 0 | -1.812194 | 4.746057  | 0.515735  |
| 30 | 1  | 0 | -0.861084 | 4.496622  | 3.771324  |
| 31 | 1  | 0 | -2.168617 | 5.962624  | 2.272749  |
| 32 | 1  | 0 | -2.384584 | 5.393134  | -0.139365 |
| 33 | 8  | 0 | -2.054799 | 0.203731  | -0.404330 |
| 34 | 8  | 0 | 1.556683  | -0.356888 | 0.702533  |
| 35 | 15 | 0 | -3.136132 | -1.074886 | -0.346614 |
| 36 | 15 | 0 | 3.081088  | -0.918714 | 1.347673  |
| 37 | 6  | 0 | -4.949184 | 0.920319  | -1.293041 |
| 38 | 6  | 0 | -5.957011 | 0.975130  | -2.218222 |
| 39 | 6  | 0 | -6.085888 | -0.324201 | -2.798184 |
| 40 | 6  | 0 | -5.150061 | -1.128901 | -2.207694 |
| 41 | 7  | 0 | -4.440713 | -0.372183 | -1.275552 |
| 42 | 1  | 0 | -4.543680 | 1.681162  | -0.648473 |
| 43 | 1  | 0 | -6.542967 | 1.849504  | -2.457652 |
| 44 | 1  | 0 | -6.788713 | -0.626677 | -3.558982 |
| 45 | 1  | 0 | -4.919899 | -2.172230 | -2.354085 |
| 46 | 6  | 0 | -4.122853 | -1.768857 | 2.093155  |
| 47 | 6  | 0 | -4.506050 | -1.215513 | 3.283155  |
| 48 | 6  | 0 | -4.211697 | 0.181081  | 3.219358  |
| 49 | 6  | 0 | -3.664008 | 0.438580  | 1.992044  |
| 50 | 7  | 0 | -3.601386 | -0.758753 | 1.286113  |
| 51 | 1  | 0 | -4.158288 | -2.788281 | 1.744136  |
| 52 | 1  | 0 | -4.934618 | -1.750327 | 4.116331  |
| 53 | 1  | 0 | -4.370924 | 0.910677  | 3.998654  |

|    |    |   |           |           |           |
|----|----|---|-----------|-----------|-----------|
| 54 | 1  | 0 | -3.271152 | 1.345699  | 1.567556  |
| 55 | 6  | 0 | 3.390404  | -1.392793 | -1.436575 |
| 56 | 6  | 0 | 3.989395  | -2.361583 | -2.192634 |
| 57 | 6  | 0 | 4.523087  | -3.346037 | -1.304458 |
| 58 | 6  | 0 | 4.228174  | -2.952499 | -0.030428 |
| 59 | 7  | 0 | 3.531837  | -1.742756 | -0.093746 |
| 60 | 1  | 0 | 2.840598  | -0.513046 | -1.722685 |
| 61 | 1  | 0 | 4.027181  | -2.376917 | -3.270926 |
| 62 | 1  | 0 | 5.050302  | -4.246498 | -1.578071 |
| 63 | 1  | 0 | 4.435010  | -3.415485 | 0.920744  |
| 64 | 6  | 0 | 5.343336  | 2.270689  | 0.747508  |
| 65 | 6  | 0 | 5.302664  | 2.159124  | 2.172770  |
| 66 | 6  | 0 | 4.520202  | 1.083468  | 2.474522  |
| 67 | 1  | 0 | 5.889078  | 3.004411  | 0.174008  |
| 68 | 1  | 0 | 5.803391  | 2.794563  | 2.886474  |
| 69 | 1  | 0 | 4.250613  | 0.651910  | 3.424620  |
| 70 | 7  | 0 | 4.058754  | 0.515386  | 1.280054  |
| 71 | 6  | 0 | 4.582864  | 1.262287  | 0.225472  |
| 72 | 1  | 0 | 4.390073  | 0.988640  | -0.795844 |
| 73 | 45 | 0 | 0.278386  | -2.258467 | 0.872467  |
| 74 | 1  | 0 | 0.198732  | -1.970879 | 2.459111  |
| 75 | 6  | 0 | -0.599407 | -3.742274 | 1.459170  |
| 76 | 8  | 0 | -1.147996 | -4.669099 | 1.853353  |
| 77 | 6  | 0 | 0.337463  | -2.778718 | -1.029810 |
| 78 | 8  | 0 | 0.306327  | -3.205244 | -2.086243 |

---

0 imaginary frequencies

### Structure C

---

| Center<br>Number | Atomic<br>Number | Atomic<br>Type | Coordinates (Angstroms) |           |           |
|------------------|------------------|----------------|-------------------------|-----------|-----------|
|                  |                  |                | X                       | Y         | Z         |
| 1                | 6                | 0              | -5.987200               | -1.741536 | -1.882017 |
| 2                | 6                | 0              | -5.105362               | -1.181717 | -0.991508 |
| 3                | 6                | 0              | -4.172589               | -0.198280 | -1.412095 |
| 4                | 6                | 0              | -4.172476               | 0.189781  | -2.781361 |
| 5                | 6                | 0              | -5.089338               | -0.412084 | -3.678994 |
| 6                | 6                | 0              | -5.981724               | -1.357383 | -3.241216 |
| 7                | 1                | 0              | -6.687097               | -2.497781 | -1.540442 |
| 8                | 1                | 0              | -5.102073               | -1.504013 | 0.043886  |
| 9                | 6                | 0              | -3.243389               | 0.410838  | -0.500554 |
| 10               | 6                | 0              | -3.256666               | 1.182683  | -3.222878 |
| 11               | 1                | 0              | -5.071210               | -0.105310 | -4.721440 |
| 12               | 1                | 0              | -6.683009               | -1.811145 | -3.934394 |
| 13               | 6                | 0              | -2.375991               | 1.757869  | -2.351929 |
| 14               | 6                | 0              | -2.367446               | 1.351895  | -0.992449 |

|    |    |   |           |           |           |
|----|----|---|-----------|-----------|-----------|
| 15 | 1  | 0 | -3.272687 | 1.486841  | -4.265719 |
| 16 | 1  | 0 | -1.682563 | 2.530941  | -2.672295 |
| 17 | 6  | 0 | -3.308929 | 0.108563  | 0.957966  |
| 18 | 6  | 0 | -4.476294 | 0.522449  | 1.695634  |
| 19 | 6  | 0 | -2.294078 | -0.513900 | 1.657729  |
| 20 | 6  | 0 | -5.534951 | 1.248638  | 1.082107  |
| 21 | 6  | 0 | -4.585849 | 0.241045  | 3.086268  |
| 22 | 6  | 0 | -2.391071 | -0.763902 | 3.052385  |
| 23 | 6  | 0 | -6.637577 | 1.636711  | 1.801104  |
| 24 | 1  | 0 | -5.463147 | 1.506061  | 0.031907  |
| 25 | 6  | 0 | -5.742352 | 0.645308  | 3.800998  |
| 26 | 6  | 0 | -3.511938 | -0.411819 | 3.744323  |
| 27 | 1  | 0 | -1.531590 | -1.204437 | 3.546407  |
| 28 | 6  | 0 | -6.753904 | 1.324888  | 3.174773  |
| 29 | 1  | 0 | -7.428174 | 2.193323  | 1.308001  |
| 30 | 1  | 0 | -5.802883 | 0.410175  | 4.860303  |
| 31 | 1  | 0 | -3.584377 | -0.605744 | 4.810720  |
| 32 | 1  | 0 | -7.634702 | 1.633284  | 3.728480  |
| 33 | 8  | 0 | -1.501187 | 1.976186  | -0.122877 |
| 34 | 8  | 0 | -1.057847 | -0.817439 | 1.149249  |
| 35 | 15 | 0 | -0.370137 | -1.471465 | -0.194230 |
| 36 | 15 | 0 | 0.144868  | 1.935563  | -0.335633 |
| 37 | 7  | 0 | -1.674031 | -2.294266 | -0.956026 |
| 38 | 6  | 0 | -1.919523 | -2.279542 | -2.322982 |
| 39 | 6  | 0 | -2.480408 | -3.265260 | -0.377011 |
| 40 | 6  | 0 | -2.874465 | -3.216542 | -2.597788 |
| 41 | 1  | 0 | -1.384274 | -1.589927 | -2.959376 |
| 42 | 6  | 0 | -3.227608 | -3.843894 | -1.362911 |
| 43 | 1  | 0 | -2.417336 | -3.467502 | 0.683008  |
| 44 | 1  | 0 | -3.292592 | -3.421724 | -3.572739 |
| 45 | 1  | 0 | -3.960162 | -4.625952 | -1.220383 |
| 46 | 7  | 0 | 0.355836  | -2.824646 | 0.621386  |
| 47 | 6  | 0 | 0.105865  | -3.326544 | 1.882709  |
| 48 | 6  | 0 | 1.169718  | -3.716204 | -0.051015 |
| 49 | 6  | 0 | 0.763451  | -4.521710 | 2.009781  |
| 50 | 1  | 0 | -0.495674 | -2.769588 | 2.582112  |
| 51 | 6  | 0 | 1.438695  | -4.771502 | 0.780257  |
| 52 | 1  | 0 | 1.457294  | -3.525153 | -1.074455 |
| 53 | 1  | 0 | 0.781751  | -5.136496 | 2.898718  |
| 54 | 1  | 0 | 2.057140  | -5.623717 | 0.537289  |
| 55 | 7  | 0 | 0.437411  | 3.412718  | -1.178620 |
| 56 | 6  | 0 | 0.003909  | 4.677081  | -0.805222 |
| 57 | 6  | 0 | 0.983939  | 3.495643  | -2.452929 |

|     |    |   |           |           |           |
|-----|----|---|-----------|-----------|-----------|
| 58  | 6  | 0 | 0.284545  | 5.544725  | -1.822014 |
| 59  | 1  | 0 | -0.459174 | 4.826984  | 0.158945  |
| 60  | 6  | 0 | 0.906878  | 4.794526  | -2.869560 |
| 61  | 1  | 0 | 1.362264  | 2.606351  | -2.934902 |
| 62  | 1  | 0 | 0.075987  | 6.605201  | -1.820914 |
| 63  | 1  | 0 | 1.260677  | 5.174175  | -3.817456 |
| 64  | 7  | 0 | 0.410800  | 2.565087  | 1.264092  |
| 65  | 6  | 0 | 1.577519  | 3.189461  | 1.673924  |
| 66  | 6  | 0 | -0.360810 | 2.291282  | 2.383709  |
| 67  | 6  | 0 | 1.537812  | 3.322655  | 3.036112  |
| 68  | 1  | 0 | 2.319041  | 3.501512  | 0.951297  |
| 69  | 6  | 0 | 0.307918  | 2.756434  | 3.485587  |
| 70  | 1  | 0 | -1.326019 | 1.820826  | 2.280254  |
| 71  | 1  | 0 | 2.301775  | 3.789741  | 3.641159  |
| 72  | 1  | 0 | -0.057836 | 2.717173  | 4.502066  |
| 73  | 45 | 0 | 0.942643  | 0.004317  | -1.301904 |
| 74  | 1  | 0 | -0.296159 | 0.214857  | -2.235627 |
| 75  | 15 | 0 | 2.938527  | -0.345243 | -0.006975 |
| 76  | 6  | 0 | 3.864459  | 1.222779  | 0.267306  |
| 77  | 6  | 0 | 3.916678  | 2.139329  | -0.789649 |
| 78  | 6  | 0 | 4.482765  | 1.544734  | 1.478380  |
| 79  | 6  | 0 | 4.563204  | 3.361994  | -0.636305 |
| 80  | 1  | 0 | 3.425803  | 1.902981  | -1.729435 |
| 81  | 6  | 0 | 5.129372  | 2.769935  | 1.631767  |
| 82  | 1  | 0 | 4.436154  | 0.852525  | 2.314093  |
| 83  | 6  | 0 | 5.166022  | 3.681728  | 0.579799  |
| 84  | 1  | 0 | 4.576288  | 4.069292  | -1.459609 |
| 85  | 1  | 0 | 5.594563  | 3.015286  | 2.581537  |
| 86  | 1  | 0 | 5.657825  | 4.640932  | 0.707707  |
| 87  | 6  | 0 | 2.745890  | -1.003371 | 1.693698  |
| 88  | 6  | 0 | 3.351819  | -2.177693 | 2.142374  |
| 89  | 6  | 0 | 1.927606  | -0.274958 | 2.566318  |
| 90  | 6  | 0 | 3.153855  | -2.604958 | 3.455262  |
| 91  | 1  | 0 | 3.964312  | -2.770755 | 1.470772  |
| 92  | 6  | 0 | 1.742325  | -0.698366 | 3.877154  |
| 93  | 1  | 0 | 1.446854  | 0.638192  | 2.231087  |
| 94  | 6  | 0 | 2.359683  | -1.865611 | 4.325742  |
| 95  | 1  | 0 | 3.619472  | -3.526425 | 3.791120  |
| 96  | 1  | 0 | 1.117603  | -0.105446 | 4.539093  |
| 97  | 1  | 0 | 2.215555  | -2.201410 | 5.348238  |
| 98  | 6  | 0 | 4.234461  | -1.417785 | -0.746441 |
| 99  | 6  | 0 | 5.542934  | -1.398809 | -0.246498 |
| 100 | 6  | 0 | 3.924351  | -2.273943 | -1.804680 |

|     |   |   |          |           |           |
|-----|---|---|----------|-----------|-----------|
| 101 | 6 | 0 | 6.516613 | -2.228186 | -0.790954 |
| 102 | 1 | 0 | 5.799366 | -0.729110 | 0.570377  |
| 103 | 6 | 0 | 4.901267 | -3.104277 | -2.351995 |
| 104 | 1 | 0 | 2.916889 | -2.280875 | -2.209354 |
| 105 | 6 | 0 | 6.196140 | -3.083572 | -1.844904 |
| 106 | 1 | 0 | 7.527593 | -2.203992 | -0.396551 |
| 107 | 1 | 0 | 4.647813 | -3.760699 | -3.178356 |
| 108 | 1 | 0 | 6.958463 | -3.727345 | -2.272461 |
| 109 | 6 | 0 | 1.816120 | -0.052340 | -2.989722 |
| 110 | 8 | 0 | 2.271668 | -0.055645 | -4.045594 |

0 imaginary frequencies

### Structure D

| Center<br>Number | Atomic<br>Number | Atomic<br>Type | Coordinates (Angstroms) |           |           |
|------------------|------------------|----------------|-------------------------|-----------|-----------|
|                  |                  |                | X                       | Y         | Z         |
| 1                | 6                | 0              | -3.856304               | 4.061854  | 2.388204  |
| 2                | 6                | 0              | -3.794844               | 2.943886  | 1.596025  |
| 3                | 6                | 0              | -3.218237               | 1.738997  | 2.080744  |
| 4                | 6                | 0              | -2.728045               | 1.709963  | 3.418251  |
| 5                | 6                | 0              | -2.809714               | 2.883395  | 4.213271  |
| 6                | 6                | 0              | -3.353159               | 4.037090  | 3.710793  |
| 7                | 1                | 0              | -4.290945               | 4.975999  | 1.996846  |
| 8                | 1                | 0              | -4.176348               | 2.972500  | 0.580874  |
| 9                | 6                | 0              | -3.076685               | 0.577667  | 1.256351  |
| 10               | 6                | 0              | -2.147078               | 0.517394  | 3.924817  |
| 11               | 1                | 0              | -2.424705               | 2.847762  | 5.228941  |
| 12               | 1                | 0              | -3.402853               | 4.931286  | 4.323692  |
| 13               | 6                | 0              | -2.037985               | -0.597588 | 3.139598  |
| 14               | 6                | 0              | -2.498236               | -0.546185 | 1.801862  |
| 15               | 1                | 0              | -1.783585               | 0.504046  | 4.948408  |
| 16               | 1                | 0              | -1.598979               | -1.520590 | 3.509839  |
| 17               | 6                | 0              | -3.479507               | 0.575166  | -0.176019 |
| 18               | 6                | 0              | -4.523937               | -0.269162 | -0.670332 |
| 19               | 6                | 0              | -2.803942               | 1.374580  | -1.070943 |
| 20               | 6                | 0              | -5.260489               | -1.136629 | 0.180503  |
| 21               | 6                | 0              | -4.817667               | -0.274378 | -2.064700 |
| 22               | 6                | 0              | -3.106614               | 1.398403  | -2.453270 |
| 23               | 6                | 0              | -6.218989               | -1.974137 | -0.330058 |
| 24               | 1                | 0              | -5.046713               | -1.135242 | 1.244052  |
| 25               | 6                | 0              | -5.819108               | -1.150285 | -2.560675 |
| 26               | 6                | 0              | -4.093134               | 0.581744  | -2.935226 |
| 27               | 1                | 0              | -2.545893               | 2.066852  | -3.101393 |
| 28               | 6                | 0              | -6.501489               | -1.987104 | -1.716800 |
| 29               | 1                | 0              | -6.764968               | -2.636048 | 0.334422  |



|    |    |   |           |           |           |
|----|----|---|-----------|-----------|-----------|
| 30 | 1  | 0 | -6.027903 | -1.146422 | -3.627157 |
| 31 | 1  | 0 | -4.332221 | 0.576935  | -3.994898 |
| 32 | 1  | 0 | -7.259326 | -2.658891 | -2.106670 |
| 33 | 8  | 0 | -2.353086 | -1.671770 | 1.016672  |
| 34 | 8  | 0 | -1.793150 | 2.194631  | -0.610876 |
| 35 | 15 | 0 | -0.224580 | 1.719351  | -0.897341 |
| 36 | 15 | 0 | -0.841274 | -2.003516 | 0.414384  |
| 37 | 7  | 0 | 0.426467  | 2.996604  | 0.079613  |
| 38 | 6  | 0 | -0.050610 | 3.341652  | 1.333129  |
| 39 | 6  | 0 | 1.657553  | 3.604308  | -0.109292 |
| 40 | 6  | 0 | 0.857756  | 4.185550  | 1.917866  |
| 41 | 1  | 0 | -1.005753 | 2.972494  | 1.676039  |
| 42 | 6  | 0 | 1.940283  | 4.351735  | 1.003615  |
| 43 | 1  | 0 | 2.205356  | 3.466050  | -1.031427 |
| 44 | 1  | 0 | 0.744138  | 4.649937  | 2.887354  |
| 45 | 1  | 0 | 2.823976  | 4.958684  | 1.140439  |
| 46 | 7  | 0 | 0.045224  | 2.470277  | -2.436924 |
| 47 | 6  | 0 | -0.169468 | 3.807443  | -2.739302 |
| 48 | 6  | 0 | 0.216230  | 1.779782  | -3.627462 |
| 49 | 6  | 0 | -0.107148 | 3.959271  | -4.096340 |
| 50 | 1  | 0 | -0.341147 | 4.520267  | -1.946563 |
| 51 | 6  | 0 | 0.136841  | 2.668927  | -4.662523 |
| 52 | 1  | 0 | 0.355672  | 0.710370  | -3.628217 |
| 53 | 1  | 0 | -0.215497 | 4.891987  | -4.631509 |
| 54 | 1  | 0 | 0.241445  | 2.427406  | -5.710632 |
| 55 | 7  | 0 | -0.217889 | -2.943078 | 1.723261  |
| 56 | 6  | 0 | -0.877927 | -3.988204 | 2.355816  |
| 57 | 6  | 0 | 0.860995  | -2.565338 | 2.510900  |
| 58 | 6  | 0 | -0.208667 | -4.280020 | 3.511707  |
| 59 | 1  | 0 | -1.762259 | -4.418779 | 1.909428  |
| 60 | 6  | 0 | 0.895563  | -3.375304 | 3.610601  |
| 61 | 1  | 0 | 1.485356  | -1.734559 | 2.218356  |
| 62 | 1  | 0 | -0.470240 | -5.062482 | 4.210176  |
| 63 | 1  | 0 | 1.632631  | -3.329700 | 4.399476  |
| 64 | 7  | 0 | -1.391018 | -3.310057 | -0.571638 |
| 65 | 6  | 0 | -0.626743 | -4.418143 | -0.904273 |
| 66 | 6  | 0 | -2.394892 | -3.168503 | -1.515937 |
| 67 | 6  | 0 | -1.168921 | -4.992783 | -2.022095 |
| 68 | 1  | 0 | 0.206590  | -4.713129 | -0.282643 |
| 69 | 6  | 0 | -2.289907 | -4.199477 | -2.410209 |
| 70 | 1  | 0 | -3.101657 | -2.353708 | -1.441627 |
| 71 | 1  | 0 | -0.816264 | -5.895659 | -2.499696 |
| 72 | 1  | 0 | -2.956695 | -4.379805 | -3.241088 |
| 73 | 45 | 0 | 0.426506  | -0.412240 | -0.465609 |

|     |    |   |          |           |           |
|-----|----|---|----------|-----------|-----------|
| 74  | 1  | 0 | 0.290988 | 0.172339  | 1.002675  |
| 75  | 15 | 0 | 2.766670 | -0.300223 | -0.064098 |
| 76  | 6  | 0 | 3.742109 | -1.788042 | -0.519850 |
| 77  | 6  | 0 | 3.120211 | -3.038573 | -0.453806 |
| 78  | 6  | 0 | 5.087950 | -1.713085 | -0.895928 |
| 79  | 6  | 0 | 3.831487 | -4.197771 | -0.752296 |
| 80  | 1  | 0 | 2.072596 | -3.096120 | -0.169029 |
| 81  | 6  | 0 | 5.795970 | -2.872247 | -1.200668 |
| 82  | 1  | 0 | 5.580363 | -0.746064 | -0.953472 |
| 83  | 6  | 0 | 5.169311 | -4.115167 | -1.128584 |
| 84  | 1  | 0 | 3.336428 | -5.162459 | -0.699241 |
| 85  | 1  | 0 | 6.837887 | -2.804393 | -1.497746 |
| 86  | 1  | 0 | 5.722923 | -5.016997 | -1.370687 |
| 87  | 6  | 0 | 3.646042 | 1.044038  | -0.962489 |
| 88  | 6  | 0 | 4.575177 | 1.895308  | -0.358531 |
| 89  | 6  | 0 | 3.293191 | 1.262527  | -2.298825 |
| 90  | 6  | 0 | 5.120288 | 2.959521  | -1.075781 |
| 91  | 1  | 0 | 4.854608 | 1.746578  | 0.680265  |
| 92  | 6  | 0 | 3.831898 | 2.326572  | -3.014190 |
| 93  | 1  | 0 | 2.565902 | 0.610840  | -2.774718 |
| 94  | 6  | 0 | 4.743861 | 3.183419  | -2.397898 |
| 95  | 1  | 0 | 5.830995 | 3.623131  | -0.592788 |
| 96  | 1  | 0 | 3.517770 | 2.497309  | -4.039294 |
| 97  | 1  | 0 | 5.154801 | 4.025626  | -2.945694 |
| 98  | 6  | 0 | 3.255937 | 0.012206  | 1.676465  |
| 99  | 6  | 0 | 4.178204 | -0.774110 | 2.370400  |
| 100 | 6  | 0 | 2.635591 | 1.085127  | 2.329892  |
| 101 | 6  | 0 | 4.468619 | -0.494172 | 3.706275  |
| 102 | 1  | 0 | 4.662903 | -1.611562 | 1.877135  |
| 103 | 6  | 0 | 2.943035 | 1.372621  | 3.653965  |
| 104 | 1  | 0 | 1.908919 | 1.699628  | 1.804313  |
| 105 | 6  | 0 | 3.855788 | 0.577880  | 4.347804  |
| 106 | 1  | 0 | 5.177466 | -1.117647 | 4.242373  |
| 107 | 1  | 0 | 2.457712 | 2.213350  | 4.140255  |
| 108 | 1  | 0 | 4.085546 | 0.792507  | 5.386935  |
| 109 | 6  | 0 | 0.538076 | -1.314170 | -2.197653 |
| 110 | 8  | 0 | 0.605659 | -1.900100 | -3.175726 |

0 imaginary frequencies

References:

[1] Liang, Z.; Chen, J.; Chen, X.; Zhang, K; Lv, J.; Zhao, H.; Zhang, G.; Xie, C.; Zong, L.; Jia, X. *Chem. Commun.*, **2019**, *55*, 13721-13724.

[2] Wang, Z.; Yang, Y. *RSC Adv.*, **2020**, *10*, 29263-29267.

[3] Jia, X.; Ren, X.; Wang, Z.; Xia, C.; Ding, K. *Chin. J. Org. Chem.*, 2019, **39**, 207-214.
